# Supplementary material for: Epigenetic prediction of complex traits and death
Source: PubMed Central journal article supplement (PMC6158884; doi:10.1186/s13059-018-1514-1), 2018-09-27

**Figure S1:** Correlations between phenotypes in Generation Scotland samples

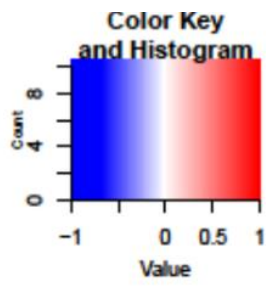

### GS Phenotype Correlations

|                   |        |         |         |           |                   |                 |                 |                 |                 |            |
|-------------------|--------|---------|---------|-----------|-------------------|-----------------|-----------------|-----------------|-----------------|------------|
| BMI               | 1      |         |         |           |                   |                 |                 |                 |                 |            |
| Smoking           | -0.002 | 1       |         |           |                   |                 |                 |                 |                 |            |
| Alcohol           | 6e-04  | 0.1     | 1       |           |                   |                 |                 |                 |                 |            |
| Education         | -0.1   | -0.2    | -0.04   | 1         |                   |                 |                 |                 |                 |            |
| Total cholesterol | 0.1    | 0.04    | 0.03    | -0.05     | 1                 |                 |                 |                 |                 |            |
| HDL cholesterol   | -0.3   | -0.07   | 0.05    | 0.01      | 0.2               | 1               |                 |                 |                 |            |
| LDL cholesterol   | 0.2    | 0.06    | 0.02    | -0.06     | 0.9               | -0.2            | 1               |                 |                 |            |
| Total:HDL ratio   | 0.3    | 0.1     | -0.007  | -0.05     | 0.5               | -0.7            | 0.8             | 1               |                 |            |
| Waist-Hip ratio   | 0.4    | 0.2     | 0.2     | -0.1      | 0.06              | -0.3            | 0.2             | 0.3             | 1               |            |
| % Body fat        | 0.6    | 0.02    | -0.2    | -0.1      | 0.2               | 0.007           | 0.2             | 0.09            | 0.03            | 1          |
|                   | BMI    | Smoking | Alcohol | Education | Total cholesterol | HDL cholesterol | LDL cholesterol | Total:HDL ratio | Waist-Hip ratio | % Body fat |

**Figure S2:** Correlations between phenotypes in LBC1936 samples

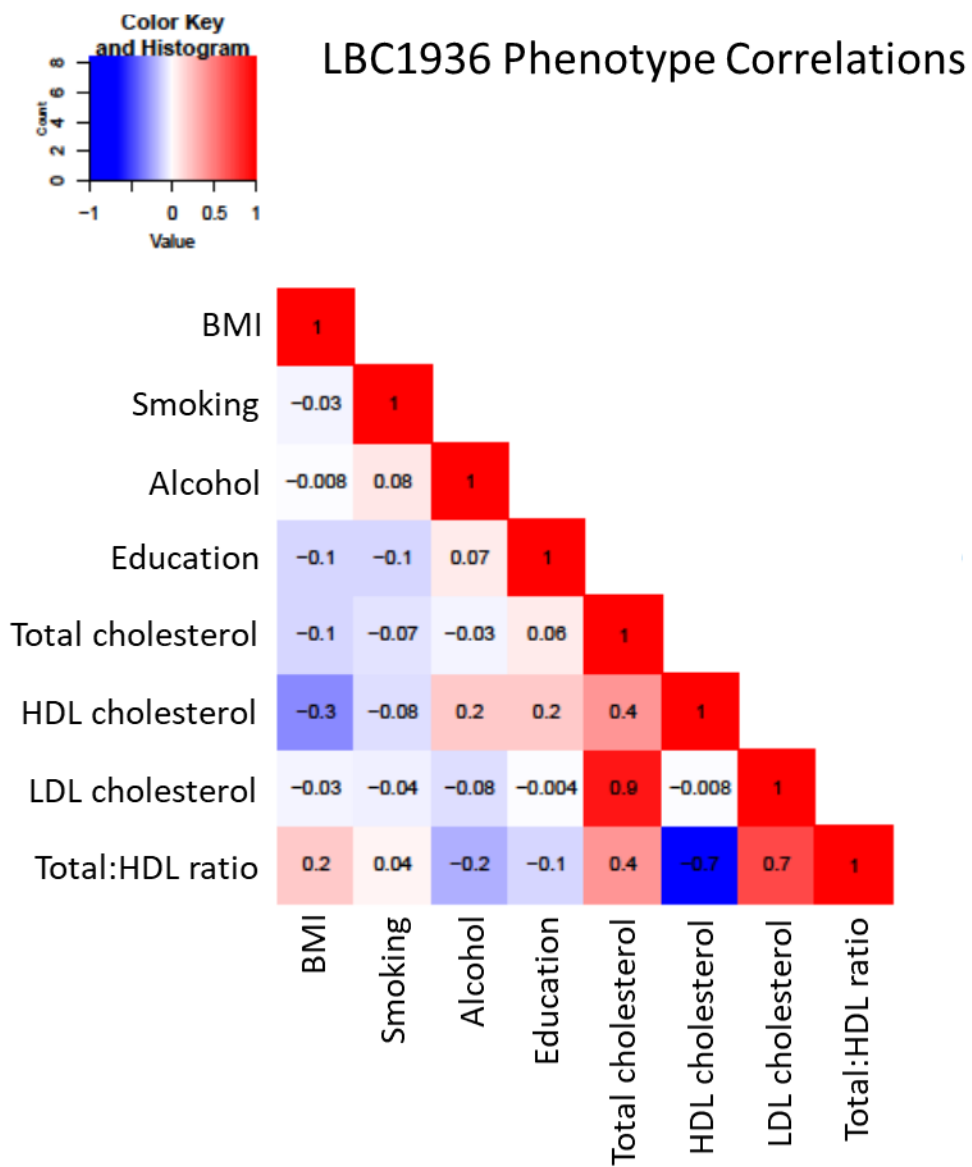

**Figure S3:** Correlations between DNA methylation scores in LBC1936 samples

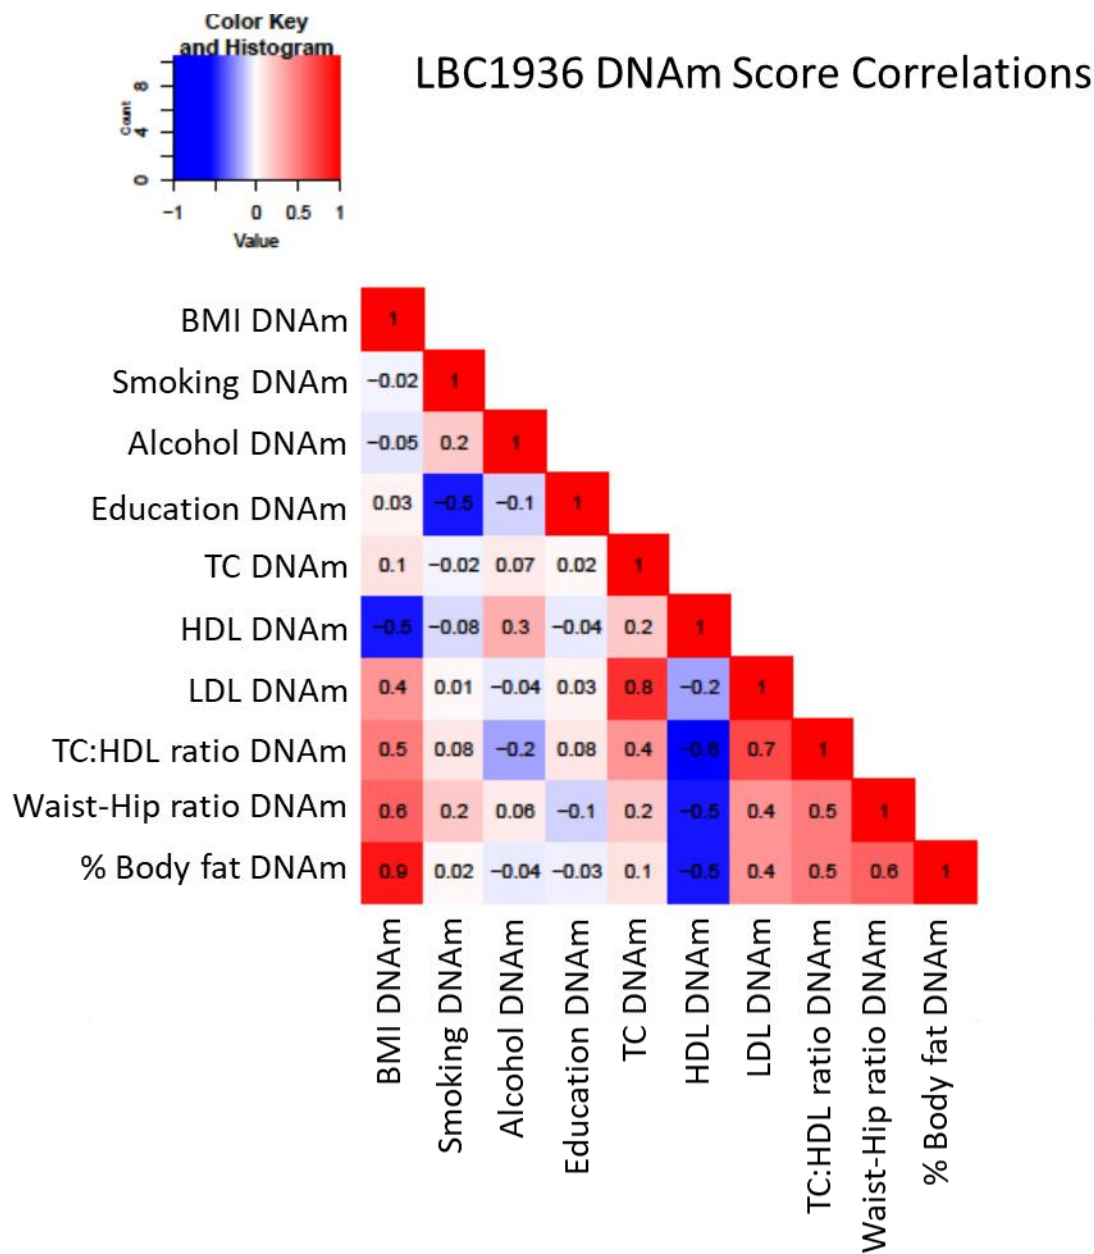

**Figure S4:** Correlations between genetic scores in LBC1936 samples

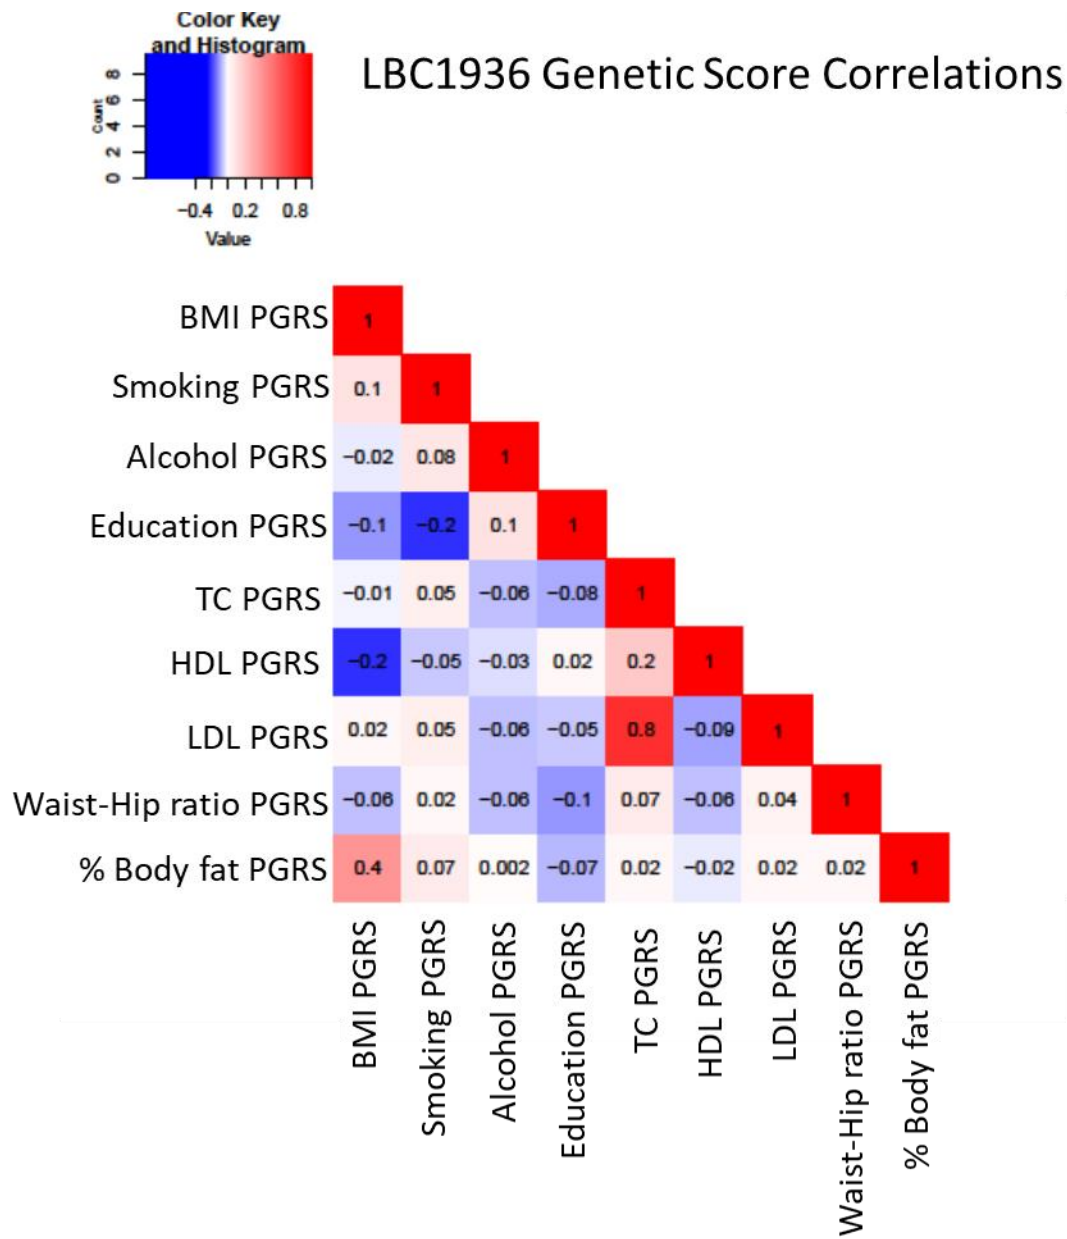

**Figure S5:** Hazard ratios for phenotypic predictors of mortality in LBC1936 samples

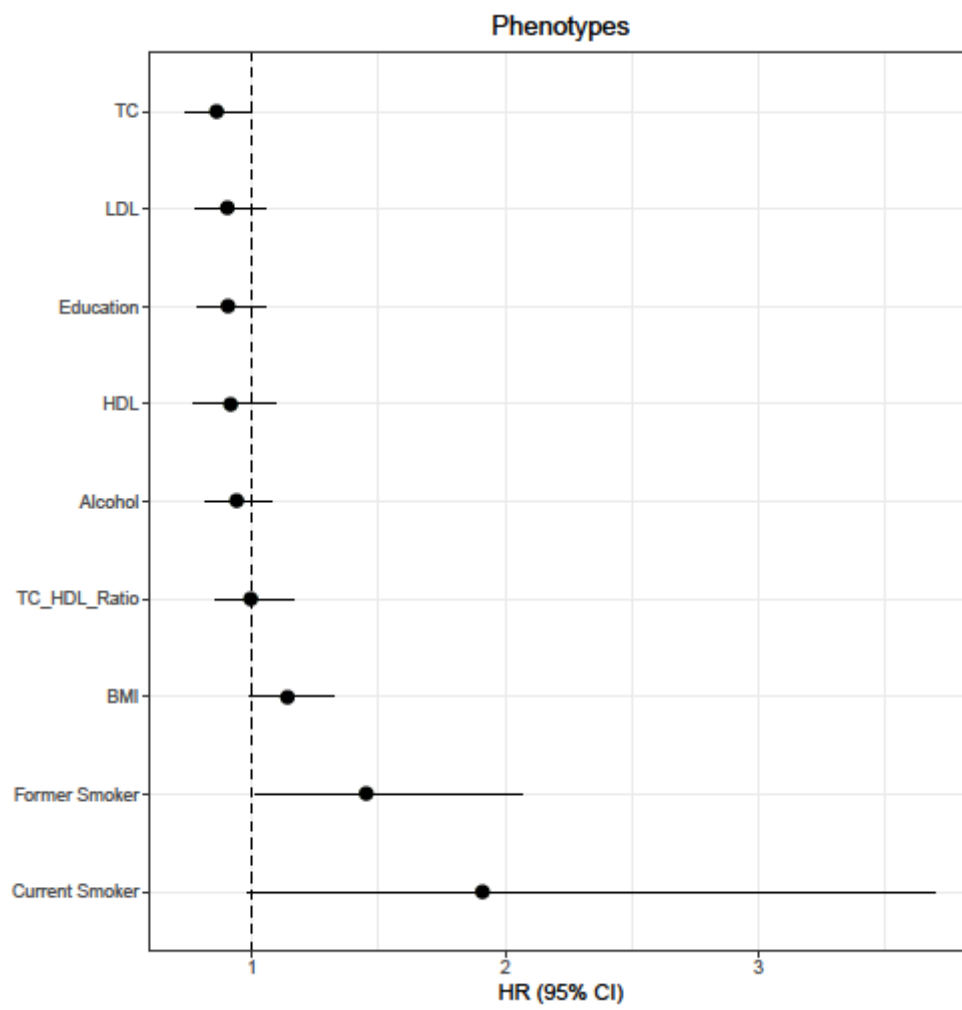

**Figure S6:** Hazard ratios for polygenic predictors of mortality in LBC1936 samples

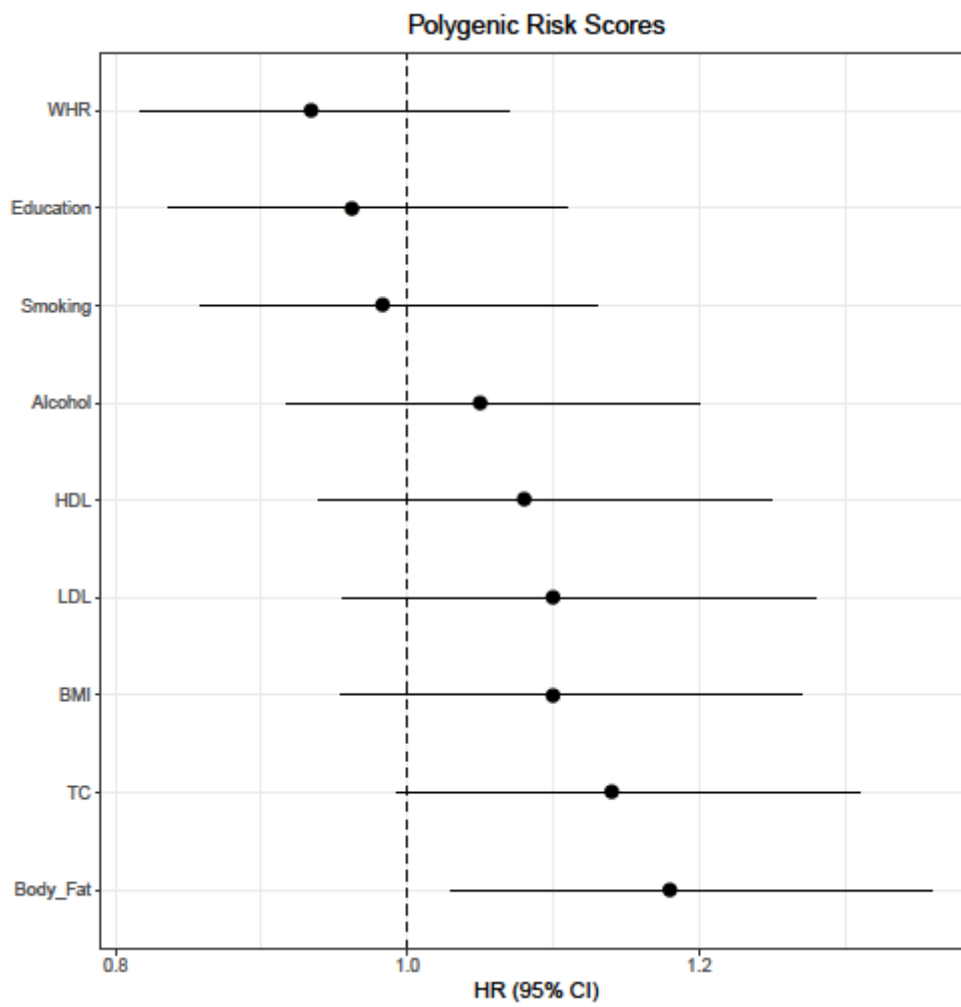

**Figure S7:** DNAm scores for current, former and never smokers in LBC1936

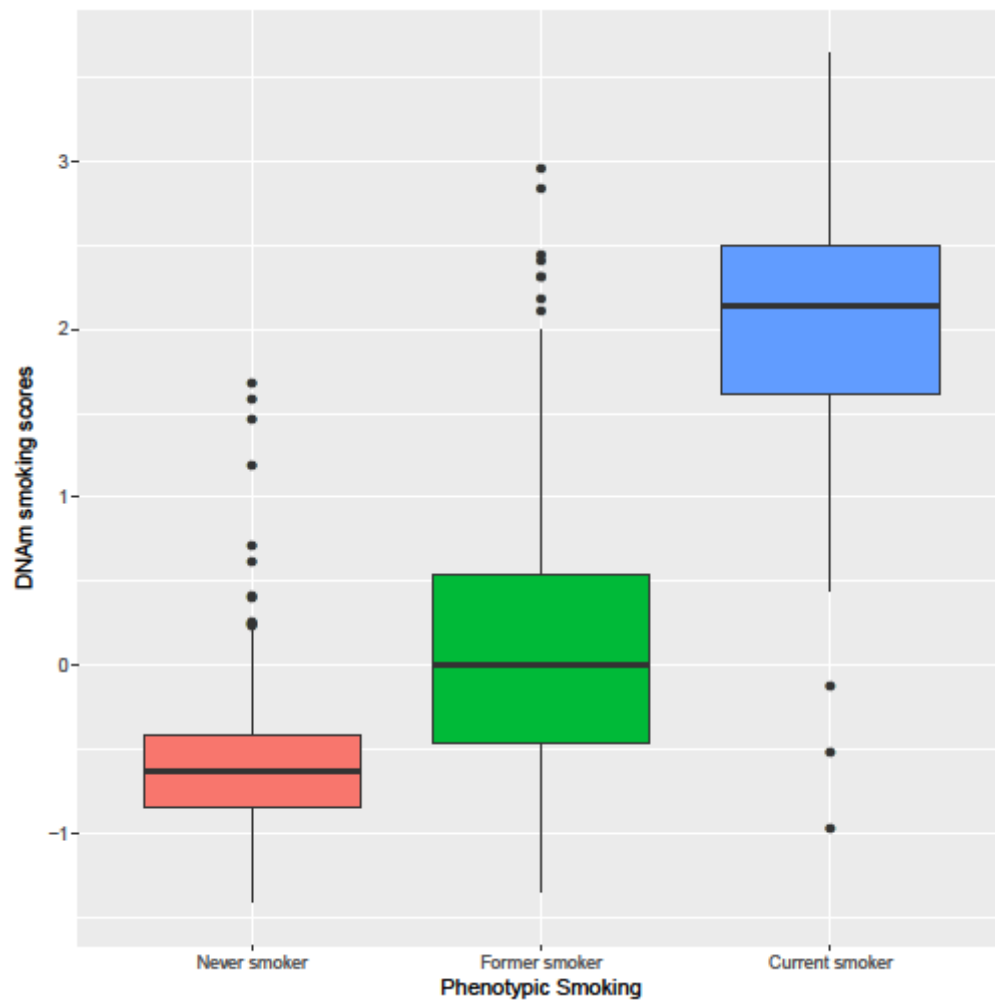

Supplement: 13059_2018_1514_MOESM2_ESM.pdf [file 13059_2018_1514_MOESM2_ESM.pdf]
